# Supplementary material for: Women’s satisfaction with early pregnancy loss healthcare and follow-up support: A cross-sectional study in England
Source: Research Square preprint supplement (doi:10.21203/rs.3.rs-7419492/v1), 2025-09-25
Supplement: Supplementary file 1 [file 1ea23f338854af6b91e5f38e.docx]

# **Supplementary File S1**

**Have you experienced a first-trimester pregnancy loss in the last three years and live in England?**

If so, you are invited to participate in a research study exploring experiences of healthcare service provisions during early pregnancy loss. This study is led by Dr Jane Williams and Dr Faye Powell from the University of Bedfordshire. If you want to ask any questions before participating in this survey, please email us at [pregnancylossmatters@beds.ac.uk](mailto:pregnancylossmatters@beds.ac.uk).

We are very sorry that you and your family have experienced an early pregnancy loss, and we understand this is a difficult experience. We would invite you to take part in this study to help understand your experiences of the care you received, including how your miscarriage was confirmed and if you received any treatment or aftercare support. By understanding your experiences, we hope that our research will help improve future care.

The survey should take about 20-30 minutes to complete, but please take your time as you go through the questions. Your participation in this study is entirely voluntary. You do not have to answer any questions you do not want to. If you want to withdraw, please close the browser during the completion of the questionnaire. Please note that following the submission of the questionnaire, the data cannot be withdrawn as it will not be identifiable.

We believe no known risks are associated with this research study; however, some of the questions will relate to your pregnancy loss experiences. If you feel uncomfortable, please feel free to withdraw from the study anytime. Your answers will remain strictly confidential, and any information you provide will be kept anonymous for any research outputs/publications.

All data will be collected and processed in accordance with the Data Protection Act 2018 and the General Data Protection Regulation. Your data will be held securely on a password-protected hard drive of a university laptop, only accessible by the research team, and stored for a minimum of 3 years. This research has received favourable ethics opinion from the Institute for Health Research Ethics Committee in the University of Bedfordshire. If you have concerns that cannot be resolved through the lead researcher, please contact [ethicsihr@beds.ac.uk](mailto:ethicsihr@beds.ac.uk).

Thank you for taking the time to participate in this survey. Your help is very much appreciated.

- I confirm that I have read and understood the participant information for the above study.
- I understand that my participation is voluntary and that I am free to withdraw without giving a reason.
- I understand that I can exit the survey at any time, and by doing so, my data will be deleted.
- I understand that NO identifiable data will be disclosed to researchers at the University of Bedfordshire or any outside agency.
- I understand that once I submit the questionnaire my data cannot be withdrawn as it will not be identifiable.
- I confirm that I have read and understood the information above and agree to take part in the survey.

If you have read and understood the information above and agree to take part in the survey, please click next.

**Eligibility Screening**

Before we proceed, we need to ask you some brief questions:

Please enter the following details.

**Are you: (*must be the person who experienced early pregnancy loss)**

☐ The person who experienced the early pregnancy loss (physically)

☐ The partner of the person who experienced the early pregnancy loss[Ineligible]

**Age [*must be over 16 years of age]**

☐

**Where do you live? [*must live in England]**

☐ I live in England

☐ I live outside England [Ineligible]

**We are interested in geographical variations in care, please can you share the county you lived when you experienced the loss.**

**Have you had an early pregnancy loss in the first trimester (less than 13 weeks gestation) within the last 3 years?**

☐ Yes

☐ No [Ineligible]

[If Eligible]

Thank you. Please begin the survey

[If Not Eligible]

‘Thank you. Unfortunately, on this occasion you are not eligible for this survey. Thank you for taking the time to look at our survey. If you are interested in participating in future research or helping us shape future research, please sign up for our participant pool via this link, and we will contact you about any upcoming research studies. If you need support following a miscarriage, please contact the Miscarriage Association who provide information and support to people who have experienced early pregnancy loss.

**Section 1: About your pregnancies**

**How many first-trimester losses have you had?**

☐ One

☐ Two

☐ Three

☐ Four or more

**How many weeks’ along was the pregnancy when the loss was established (the time when the loss was identified)?**

☐ < 6 weeks gestation

☐ 6 – 7 weeks’ gestation

☐ 8 - 9 weeks’ gestation

☐ 10 -11 weeks' gestation

☐ 12 -13 weeks’ gestation

☐ Unsure

☐ Other [please specify]

☐ Prefer not to say

**How long ago was your early pregnancy loss if you had more than one loss please refer to the most recent.**

☐ In the last month

☐ In the last 3 months

☐ In the last 6 months

☐ In the last 12 months

☐ More than 12 months ago

**What type of early pregnancy loss did you have (please select one only)? If you have had more than one loss please refer to the most recent.**

☐ Chemical Pregnancy (early pregnancy loss within first five weeks)

☐ Blighted Ovum (Early pregnancy without an embryo)

☐ Complete miscarriage

☐ Incomplete miscarriage

☐ Missed miscarriage (miscarriage without symptoms)

☐ Termination for Medical Reasons

☐ Molar (partial or complete)

☐ Ectopic (pregnancy where fertilised egg implants outside of uterus)

☐ Other [please specify]

☐ Do not know

☐ Prefer not to say

**Have you had two or more miscarriages in a row? This is often referred to as recurrent miscarriage.**

☐ Yes

☐ No

☐ Prefer not to say

**Have you ever been referred for/ received medical tests to investigate the causes of any of your losses?**

☐ Yes

☐ No

☐ Prefer not to say

**How satisfied were you with how long it took to receive the medical tests to investigate the cause of your loss(es)?**

☐ Strongly dissatisfied

☐ Dissatisfied

☐ Neither satisfied nor dissatisfied

☐ Satisfied

☐ Strongly satisfied

☐ Not relevant

**How satisfied were you with the explanation(s) you were given as a result of the investigation?**

☐ Strongly dissatisfied

☐ Dissatisfied

☐ Neither satisfied nor dissatisfied

☐ Satisfied

☐ Strongly satisfied

☐ Not relevant

**At any time in the past, have you experienced (select all that apply)**

☐ Second-trimester miscarriage/loss (13- 23 weeks gestation)

☐ Stillbirth (over 24 weeks gestation)

☐ Pregnancy termination for medical or other reasons (13-23 weeks gestation)

☐ Pregnancy termination for medical or other reasons (over 24 weeks gestation)

☐ Neonatal death (First 28 days after birth)

☐ None of the above

☐ Prefer not to say

**Do you have any living children?**

☐ Yes

☐ No

☐ Prefer not to say

**How many living children do you have?**

☐ 0

☐ 1

☐ 2

☐ 3+

☐ Prefer not to say

**Have you ever been diagnosed with infertility (i.e., unable to conceive after 12 months of trying) or secondary infertility (unable to carry a pregnancy to term after having given birth before) by a healthcare professional?**

☐ Yes

☐ No

☐ I don't know

☐ Prefer not to say

**Have you and/or your partner ever received treatment for a fertility issue?**

☐ Yes, I have received treatment

☐ Yes, my partner has received treatment

☐ Yes, we both have received treatment

☐ No

☐ I don't know

☐ Prefer not to say

**Section 2: About your experience of early pregnancy loss**

The next few questions will ask about your miscarriage. If you have had more than one miscarriage, please think about your **most recent first-trimester loss only.**

**What was your relationship status at the time of the early pregnancy loss**?

☐ Single

☐ Married and living with my partner

☐ Not married and living with my partner

☐ In a relationship but not living with my partner

☐ Divorced or separated

☐ Other [please specify]

☐ Prefer not to say

**At the time of your early pregnancy loss, did you go to: [Please select all that apply].**

☐ GP

☐ Emergency department

☐ Early pregnancy assessment unit

☐ Walk-in clinic

☐ Private ultrasound clinic

☐ None

☐ Other [please specify]

☐ Prefer not to say

**Who referred you to the early pregnancy assessment unit? *Reveal only if Early pregnancy assessment unit is selected***

☐ Self-referral

☐ GP

☐ Urgent Care GP

☐ Accident and Emergency nurse/doctor

☐ NHS 111

☐ Community midwife

☐ Other healthcare professional [please specify]

**How satisfied were you with how long you had to wait for your appointment to attend the early pregnancy assessment unit? *Reveal only if Early pregnancy assessment unit is ticked***

☐ Very satisfied

☐ Satisfied

☐ Neither satisfied nor unsatisfied

☐ Dissatisfied

☐ Very dissatisfied

☐ Not applicable

**At the time of the miscarriage, which healthcare professional/s did you see/speak to? [please select all that you saw]**

☐ GP

☐ Urgent Care GP

☐ Accident and Emergency department nurse

☐ Accident and Emergency department doctor

☐ Early Pregnancy Assessment Unit (EPAU) Nurse

☐ Sonographer (hospital)

☐ Sonographer (private)

☐ Obstetrician

☐ Midwife

☐ Health visitor

☐ Paramedic

☐ None

☐ Other [please specify]

☐ Prefer not to say

**Did you have an ultrasound to confirm the early pregnancy loss?**

☐ Yes

☐ No

**How was your early pregnancy loss managed? [Please only select one option]**

☐ Complete miscarriage – did not require further treatment

☐ Expectation management – waited for the miscarriage to happen by itself naturally, without treatment

☐ Medical management - took medication at home to help the pregnancy come away from the womb)

☐ Medical management - took medication at a medical setting to help the pregnancy come away from the womb)

☐ Surgery to remove the pregnancy at a hospital

☐ Other [please specify]

☐ Prefer not to say

**Complete miscarriage only/Prefer not to say/other**

We would now like to ask you a few questions about your overall experience in receiving care for your early pregnancy loss.  Please state your level of agreement with the following statements.

|  | Strongly disagree | Disagree | Neither agree nor disagree | Agree | Strongly agree | Not relevant |
| --- | --- | --- | --- | --- | --- | --- |
| I was satisfied with the physical medical assessment. |  |  |  |  |  |  |
| The possible reasons for my miscarriage were clearly explained to me. |  |  |  |  |  |  |
| I was able to express my feeling to the healthcare professionals involved in my care. |  |  |  |  |  |  |
| My feelings were taken in into account by healthcare professionals involved in my care. |  |  |  |  |  |  |
| My feelings of loss felt validated by the healthcare professionals involved in my care. |  |  |  |  |  |  |
| Healthcare professionals were sensitive when talking to me about my loss. |  |  |  |  |  |  |
| My worries and fears were taken into account by the healthcare professionals involved in my care. |  |  |  |  |  |  |
| There was good consideration shown to my partner. |  |  |  |  |  |  |
| My wellbeing was important to the healthcare professionals involved in my care. |  |  |  |  |  |  |
| I was shown kindness and compassion by the healthcare professionals involved in my care. |  |  |  |  |  |  |
| The healthcare professionals had the skills needed to respond to my needs |  |  |  |  |  |  |
| The information I was given about my miscarriage and what to expect was definitely enough |  |  |  |  |  |  |
| I had the opportunity to ask questions. |  |  |  |  |  |  |
| I was given appropriate pain management advice and support. |  |  |  |  |  |  |
| I knew who to contact or where to go for help if I needed it. |  |  |  |  |  |  |
| I had the opportunity to talk about my feelings |  |  |  |  |  |  |
| The discharge instructions were clearly explained to me. |  |  |  |  |  |  |
| I was satisfied with the emotional support I received. |  |  |  |  |  |  |
| My medical needs were met. |  |  |  |  |  |  |

***Medical management/Expectation management***

We would now like to ask you a few questions about your experience of care during the management of your early pregnancy loss.  Please state your level of agreement with the following statements.

|  | Strongly disagree | Disagree | Neither agree nor disagree | Agree | Strongly agree | Not relevant |
| --- | --- | --- | --- | --- | --- | --- |
| I felt informed of all the treatment options available including the risks and benefits. |  |  |  |  |  |  |
| I was given adequate time to decide the treatment option I chose. |  |  |  |  |  |  |
| I felt supported to make a decision that was right for me. |  |  |  |  |  |  |
| I was aware of what to do if there were any complications. |  |  |  |  |  |  |
| I had clear expectations of what to expect with the treatment option I chose. |  |  |  |  |  |  |
| I felt supported throughout the management of my miscarriage. |  |  |  |  |  |  |
| My worries and fears were taken into account by healthcare professionals. |  |  |  |  |  |  |
| The information I was given about what was happening and what to expect was definitely enough |  |  |  |  |  |  |
| All in all, I felt prepared for the treatment option I chose. |  |  |  |  |  |  |
| I was given appropriate pain management advice and support. |  |  |  |  |  |  |
| I knew who to contact or where to go for help if I needed it. |  |  |  |  |  |  |
| I am happy with the treatment option I chose. |  |  |  |  |  |  |

We understand that thinking about what to do with the pregnancy/baby after you experience an early pregnancy loss can be a difficult conversation.  We would like to ask you a few questions to better understand your experiences of how this was communicated with you.  If you find this too difficult or upsetting, please skip to the next question.

|  | Strongly disagree | Disagree | Neither agree nor disagree | Agree | Strongly agree | Not relevant |
| --- | --- | --- | --- | --- | --- | --- |
| Healthcare professionals were sensitive when talking to me about my options around what to do with the remains of my baby/pregnancy when I miscarry. |  |  |  |  |  |  |
| I had the right amount of information I needed to decide on what I wanted to happen with the remains of my baby/pregnancy. |  |  |  |  |  |  |
| I was given the time I needed to consider my options on what I wanted to happen with the remains of my baby/pregnancy. |  |  |  |  |  |  |
| I felt prepared and well informed about what to expect. |  |  |  |  |  |  |

***Reveal only if participant chooses ‘*Medical management took medication at home to help the pregnancy come away from the womb* OR *Expectation management – wait for the miscarriage to happen by itself naturally, without treatment)’***

We want to ask you a few questions about how you felt whilst having your miscarriage at home.

|  | Strongly disagree | Disagree | Neither agree nor disagree | Agree | Strongly agree | Not relevant |
| --- | --- | --- | --- | --- | --- | --- |
| I felt lonely having while having my miscarriage at home. | 5 | 4 | 3 | 2 | 1 |  |
| I felt isolated while having my miscarriage at home. | 5 | 4 | 3 | 2 | 1 |  |
| I felt relieved that I was able to have my miscarriage at home. | 1 | 2 | 3 | 4 | 5 |  |
| I felt comfortable knowing I was able to have my miscarriage at home. | 1 | 2 | 3 | 4 | 5 |  |

***Surgical management***

We would now like to ask you a few questions about your experience of care during the surgical management of your early pregnancy loss. Please state your level of agreement with the following statements.

|  | Strongly disagree | Disagree | Neither agree nor disagree | Agree | Strongly agree | Not relevant |
| --- | --- | --- | --- | --- | --- | --- |
| I felt informed of all the treatment options available including the risks and benefits. |  |  |  |  |  |  |
| I was given adequate time to decide on the treatment option I chose. |  |  |  |  |  |  |
| I felt supported to make a decision that was right for me. |  |  |  |  |  |  |
| I was aware of what to do if there were any complications. |  |  |  |  |  |  |
| I had clear expectations of what to expect with the treatment option I chose. |  |  |  |  |  |  |
| The information I was given about what was happening and what to expect was definitely enough |  |  |  |  |  |  |
| I felt supported throughout the management of my miscarriage. |  |  |  |  |  |  |
| My worries and fears were considered by healthcare professionals. |  |  |  |  |  |  |
| Healthcare professionals were sensitive when talking to me about what to do with the remains of my baby/pregnancy following surgery |  |  |  |  |  |  |
| I was given the time and information I needed to decide on what I wanted to happen with the remains of my baby/pregnancy. |  |  |  |  |  |  |
| All in all, I felt prepared for the treatment option I chose. |  |  |  |  |  |  |
| I was satisfied with the amount of time I had to wait for my operation. |  |  |  |  |  |  |
| I was satisfied with the discharge information I was provided. |  |  |  |  |  |  |
| I am happy with the treatment option I chose. |  |  |  |  |  |  |

We understand that thinking about what to do with the pregnancy/baby after you miscarry can be a difficult conversation.  We want to ask you a few questions to better understand your experiences of how this was communicated with you.  If you find this too difficult or upsetting, please skip to the next question.

|  | Strongly disagree | Disagree | Neither agree nor disagree | Agree | Strongly agree | Not relevant |
| --- | --- | --- | --- | --- | --- | --- |
| Healthcare professionals were sensitive when talking to me about my options around what to do with the remains of my baby/pregnancy after my operation. |  |  |  |  |  |  |
| I had the right amount of information I needed to decide on what I wanted to happen with the remains of my baby/pregnancy. |  |  |  |  |  |  |
| I was given the time I needed to consider my options on what I wanted to happen with the remains of my baby/pregnancy. |  |  |  |  |  |  |

We just want to ask you a few questions about how you felt whilst having your miscarriage at hospital.

***Reveal only if the participant chooses ‘*Medical management - took medication at a medical setting to help the pregnancy come away from the womb)*’ OR ‘*Surgery to remove the pregnancy at a hospital’***

|  | Strongly disagree | Disagree | Neither agree nor disagree | Agree | Strongly agree | Not relevant |
| --- | --- | --- | --- | --- | --- | --- |
| I felt lonely having while having my miscarriage in hospital. | 5 | 4 | 3 | 2 | 1 |  |
| I felt isolated while having my miscarriage in hospital. | 5 | 4 | 3 | 2 | 1 |  |
| I felt relieved that I was able to have my miscarriage in hospital. | 1 | 2 | 3 | 4 | 5 |  |
| I felt comfortable knowing I was able to have my miscarriage in hospital. | 1 | 2 | 3 | 4 | 5 |  |

**We would now like to ask you a few questions about your overall experience in receiving care for your miscarriage/s.  If you have had more than one miscarriage, then please answer this thinking about the most recent one where you had contact with medical professionals.**

**Please state your level of agreement with the following statements.**

|  | Strongly disagree | Disagree | Neither agree nor disagree | Agree | Strongly agree | Not relevant |
| --- | --- | --- | --- | --- | --- | --- |
| I was satisfied with the physical medical assessment. |  |  |  |  |  |  |
| The possible reasons for my miscarriage were clearly explained to me. |  |  |  |  |  |  |
| I felt that I (we) were given enough privacy. |  |  |  |  |  |  |
| I (we) were given enough time to process what was happening. |  |  |  |  |  |  |
| I was able to express my feeling to the healthcare professionals involved in my care. |  |  |  |  |  |  |
| My feelings were taken in into account by healthcare professionals involved in my care. |  |  |  |  |  |  |
| My feelings of loss felt validated by the healthcare professionals involved in my care. |  |  |  |  |  |  |
| Healthcare professionals were sensitive when talking to me about my loss. |  |  |  |  |  |  |
| There was good consideration shown to my partner. |  |  |  |  |  |  |
| My wellbeing was important to the healthcare professionals involved in my care. |  |  |  |  |  |  |
| I was shown kindness and compassion from the healthcare professionals involved in my care. |  |  |  |  |  |  |
| The information I was given about my miscarriage was definitely enough |  |  |  |  |  |  |
| I had the opportunity to ask questions. |  |  |  |  |  |  |
| The healthcare professionals involved in my care had the skills needed to respond to my needs |  |  |  |  |  |  |
| I had the opportunity to talk about my feelings |  |  |  |  |  |  |
| The discharge instructions were clearly explained to me. |  |  |  |  |  |  |
| I am satisfied with the level of emotional support I received |  |  |  |  |  |  |
| My medical needs were met. |  |  |  |  |  |  |

**Section 3: Follow-up care and support**

This section will ask you about the follow-up care and support you **used and** **accessed** **around the time or following your early pregnancy loss** that goes beyond the support offered by your partner and family. We will ask you to share what support you found helpful, and what additional support (if any) you or other families in your community would have liked or benefitted from.

This question asks about what support and follow-up care you were provided with, informed about, signposted to, or referred to ***by a healthcare professional*** and how helpful you found it or would have found it. Please tick the most suitable response for each option.

|  | Yes, I was offered, and I found it helpful. | Yes, I was offered but did not find it helpful | No, was not offered.  I think I would have found it helpful. | No, was not offered. Do not think I would have found it helpful. |
| --- | --- | --- | --- | --- |
| Discharge or follow-up instructions. |  |  |  |  |
| Written or online information about miscarriage |  |  |  |  |
| Information or leaflets about  pregnancy loss support  organisations e.g. Miscarriage Association |  |  |  |  |
| Information or signposted to hospital chaplaincy/pastoral services |  |  |  |  |
| Receipt of memorial gift or something to signify the loss |  |  |  |  |
| A follow-up *face to face* *appointment* with a healthcare professional to discuss **medical needs** (e.g. GP, EPAU nurse, midwife) |  |  |  |  |
| A follow-up *face to face* *appointment* with a healthcare professional to discuss **emotional needs** (e.g. GP, EPAU nurse, midwife) |  |  |  |  |
| A follow-up *phone or video appointment* with a healthcare professional to discuss **medical needs** (e.g. GP, EPAU nurse, midwife) |  |  |  |  |
| A follow-up *phone or video appointment* with a healthcare professional to discuss **emotional needs** (e.g. GP, EPAU nurse, midwife) |  |  |  |  |
| A follow-up email, letter or text from a healthcare professional (e.g. GP, EPU nurse, midwife) |  |  |  |  |
| Referral for group counselling |  |  |  |  |
| Referral for individual counselling |  |  |  |  |
| Referral for peer support/support group |  |  |  |  |
| Referral for mental health support |  |  |  |  |
| Healthcare provider led support group |  |  |  |  |

**Overall, how satisfied are you with the follow-up care you received from your healthcare provider/s after your miscarriage?**

☐ Strongly satisfied

☐ Satisfied

☐ Neither satisfied nor dissatisfied

☐ Dissatisfied

☐ Strongly dissatisfied

This question asks about what formal or informal support you ***sought and accessed yourself***, following your loss, and how helpful you found it or would have found it. This is support that you were not routinely offered by a healthcare professional, but support you searched for, found, and accessed yourself. Please tick the most suitable response for each option.

|  | I did access and I found it helpful. | I did access but I did not find it helpful. | Did not access. I  think I would have found it helpful. | Did not access.  Do not think I would have found it helpful. |
| --- | --- | --- | --- | --- |
| Pregnancy loss support organisations/websites |  |  |  |  |
| Local community support groups |  |  |  |  |
| Local community peer support group with others who have experienced miscarriage |  |  |  |  |
| Online peer support group with others who have experienced miscarriage |  |  |  |  |
| Online support groups or social media forums |  |  |  |  |
| Spiritual or religious support in your community |  |  |  |  |
| Support via Employee Assistance Programme |  |  |  |  |
| One-to-one counselling with a therapist |  |  |  |  |
| Couple counselling with a therapist |  |  |  |  |
| Family counselling with a therapist |  |  |  |  |
| Private medical follow-up (e.g., to explore the reason for the loss) |  |  |  |  |

**Over time, were you able to get the different types of support you needed?**

☐ Strongly agree

☐ Agree

☐ Neither agree nor disagree

☐ Disagree

☐ Strongly disagree

☐ Not relevant

**You have said that you were not able to get the different types of support you needed; what barriers did you face that made it difficult for you?**


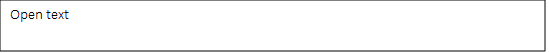


**Over time, did the type of support you needed or your need for support change?**

☐ Yes

☐ No

**Over time, how did your support needs change? Please select all that apply.**

| ☐ I needed more formal professional one-on-one support (i.e. - psychologist.) | ☐ I relied more on family and friends for support |
| --- | --- |
| ☐ I needed more formal professional group support (i.e. - Support group led by professional provider) | ☐ I relied more on myself for support (i.e. - I stopped talking about it with others) |
| ☐ I needed more online support (i.e. - Facebook group, Parent or Loss websites, etc.) | ☐ I did not need support over time |
| ☐ I needed more religious/spiritual support | ☐ I still needed support, but not as often as before |
| ☐ I needed more practical support, tools, and techniques on how to manage the grief relating to pregnancy loss | ☐ I needed more written support (i.e. - books about loss, reading other people's stories) |
| ☐ I needed more formal in-person peer support |  |
| ☐ I needed less formal support |  |
| ☐ Other [please specify] |  |

**What do you think are the key areas of need or concern for you and/or other families who experience a early pregnancy loss? Please select all that apply.**

| ☐ Better support directed to women experiencing a miscarriage | ☐ More opportunities for families to be with or speak to other families who have experienced miscarriage |
| --- | --- |
| ☐ Better follow-up support directed to women following their miscarriage | ☐ More training for healthcare providers for how to care for women who experience miscarriage |
| ☐ Better support directed to partners | ☐ More opportunities for families to share their experiences of miscarriage or to 'tell their story' to others |
| ☐ Better support for other family members (i.e., children, grandparents) | ☐ More public awareness or education about the frequency and impact of miscarriage |
| ☐ Better family support (i.e. - family counselling) | ☐ More information in general about pregnancy and pregnancy loss |
| ☐ Automatic referral to bereavement or counselling support for families after loss | ☐ More public awareness or education about existing support |
| ☐ More free local options for support | ☐ Annual local bereavement or memorial services or events |
| ☐ Better couple or relationship support | ☐ Reducing stigma or silence about pregnancy and infant loss |
| ☐ More written options for support (i.e. - books, pamphlets) | ☐ More research into the causes of pregnancy and infant loss |
| ☐ More telephone options for support | ☐ None of the above |
| ☐ More online options for support | ☐ There are no key areas of need or concern |
| ☐ Other [please specify] |  |

**Section 3: Impact of early pregnancy loss**

We would like to know what impact miscarriage has had on you.   Please answer ALL the questions by choosing the answer you think most applies to you.

|  |  | *Definitely true for me* | *Quite true for me* | *Barely true for me* | *Definitely not true for me* |
| --- | --- | --- | --- | --- | --- |
| Isolation /Guilt | 1. I felt much alone in my loss. | 4 | 3 | 2 | 1 |
| Isolation/Guilt | 1. My miscarriage destroyed my zest for life. | 4 | 3 | 2 | 1 |
| Isolation/Guilt | 1. I feel my body has betrayed me. | 4 | 3 | 2 | 1 |
| Isolation/Guilt | 1. I feel guilty about my miscarriage | 4 | 3 | 2 | 1 |
| Isolation/Guilt | 1. Through my miscarriage, I have experienced a loss of pride in myself. | 4 | 3 | 2 | 1 |
| Isolation/Guilt | 1. I feel very isolated by my miscarriage. | 4 | 3 | 2 | 1 |
| Loss of baby | 1. Through miscarriage, I feel I lost a part of myself. | 4 | 3 | 2 | 1 |
| Loss of baby | 1. I feel there will always be a place in my heart for the miscarried baby. | 4 | 3 | 2 | 1 |
| Loss of baby | 1. Through my miscarriage, I feel that I have lost a person. | 4 | 3 | 2 | 1 |
| Loss of baby | 1. I get irritated when my miscarried baby is called a foetus. | 4 | 3 | 2 | 1 |
| Loss of baby | 1. I dwell on the fact that my miscarried child will only exist in my memory. | 4 | 3 | 2 | 1 |
| Devastating event | 1. My miscarriage was a horrendous, devastating event. | 4 | 3 | 2 | 1 |
| Devastating event | 1. Miscarriage equals one big loss of control. | 4 | 3 | 2 | 1 |
| Devastating event | 1. Miscarriage is like going from one extreme of happiness to the other, total unhappiness. | 4 | 3 | 2 | 1 |
| Devastating event | 1. Miscarriage is a nightmare. | 4 | 3 | 2 | 1 |
| Devastating event | 1. My miscarriage represented a major setback for me. | 4 | 3 | 2 | 1 |

Below is a list of problems that people sometimes have in response to a very stressful experience. Thinking about your miscarriage, please read each problem carefully and then select one of the options to indicate how much you have been bothered by that problem in the past month.

**In the past month, how much were you bothered by:**

|  | **Not at all** | **A little bit** | **Moderately** | **Quite a bit** | **Extremely** |
| --- | --- | --- | --- | --- | --- |
| 1. Repeated, disturbing, and unwanted memories of the stressful experience? | 0 | 1 | 2 | 3 | 4 |
| 2. Repeated, disturbing dreams of the stressful experience? | 0 | 1 | 2 | 3 | 4 |
| 3. Suddenly feeling or acting as if the stressful experience were actually happening again (as if you were actually back there reliving it)? | 0 | 1 | 2 | 3 | 4 |
| 4. Feeling very upset when something reminded you of the stressful experience? | 0 | 1 | 2 | 3 | 4 |
| 5. Having strong physical reactions when something reminded you of the stressful experience (for example, heart pounding, trouble breathing, sweating)? | 0 | 1 | 2 | 3 | 4 |
| 6. Avoiding memories, thoughts, or feelings related to the stressful experience? | 0 | 1 | 2 | 3 | 4 |
| 7. Avoiding external reminders of the stressful experience (for example, people, places, conversations, activities, objects, or situations)? | 0 | 1 | 2 | 3 | 4 |
| 8. Trouble remembering important parts of the stressful experience? | 0 | 1 | 2 | 3 | 4 |
| 9. Having strong negative beliefs about yourself, other people, or the world (for example, having thoughts such as: I am bad, there is something seriously wrong with me, no one can be trusted, the world is completely dangerous)? | 0 | 1 | 2 | 3 | 4 |
| 10. Blaming yourself or someone else for the stressful experience or what happened after it? | 0 | 1 | 2 | 3 | 4 |
| 11. Having strong negative feelings such as fear, horror, anger, guilt, or shame? | 0 | 1 | 2 | 3 | 4 |
| 12. Loss of interest in activities that you used to enjoy? | 0 | 1 | 2 | 3 | 4 |
| 13. Feeling distant or cut off from other people? | 0 | 1 | 2 | 3 | 4 |
| 14. Trouble experiencing positive feelings (for example, being unable to feel happiness or have loving feelings for people close to you)? | 0 | 1 | 2 | 3 | 4 |
| 15. Irritable behavior, angry outbursts, or acting aggressively? | 0 | 1 | 2 | 3 | 4 |
| 16. Taking too many risks or doing things that could cause you harm? | 0 | 1 | 2 | 3 | 4 |
| 17. Being “superalert” or watchful or on guard? | 0 | 1 | 2 | 3 | 4 |
| 18. Feeling jumpy or easily startled? | 0 | 1 | 2 | 3 | 4 |
| 19. Having difficulty concentrating? | 0 | 1 | 2 | 3 | 4 |
| 20. Trouble falling or staying asleep? | 0 | 1 | 2 | 3 | 4 |

**Health Anxiety and Depression Scale**

Read each item and select the response which comes closest to how you have been feeling in the past week. Don’t take too long over your replies: your immediate reaction to each item will probably be more accurate than a long thought out response.

| **I feel tense or ‘wound up’:** | **A** |  | **I feel as if I am slowed down:** | **D** |
| --- | --- | --- | --- | --- |
| Most of the time | 3 |  | Nearly all of the time | 3 |
| A lot of the time | 2 |  | Very often | 2 |
| Time to time, occasionally | 1 |  | Sometimes | 1 |
| Not at all | 0 |  | Not at all | 0 |
|  |  |  |  |  |
| **I still enjoy the things I used to enjoy:** | **D** |  | **I get a sort of frightened feeling like ‘butterflies in the stomach’:** | **A** |
| Definitely as much | 0 |  | Not at all | 0 |
| Not quite so much | 1 |  | Occasionally | 1 |
| Only a little | 2 |  | Quite often | 2 |
| Not at all | 3 |  | Very often | 3 |
|  |  |  |  |  |
| **I get a sort of frightened feeling like something awful is about to happen:** | **A** |  | **I have lost interest in my appearance:** | **D** |
| Very definitely and quite badly | 3 |  | Definitely | 3 |
| Yes, but not too badly | 2 |  | I don’t take as much care as I should | 2 |
| A little, but it doesn’t worry me | 1 |  | I may not take quite as much care | 1 |
| Not at all | 0 |  | I take just as much care as ever | 0 |
|  |  |  |  |  |
| **I can laugh and see the funny side of things:** | **D** |  | **I feel restless as if I have to be on the move:** | **A** |
| As much as I always could | 0 |  | Very much indeed | 3 |
| Not quite so much now | 1 |  | Quite a lot | 2 |
| Definitely not so much now | 2 |  | Not very much | 1 |
| Not at all | 3 |  | Not at all | 0 |
|  |  |  |  |  |
| **Worrying thoughts go through my mind:** | **A** |  | **I look forward with enjoyment to things:** | **D** |
| A great deal of the time | 3 |  | A much as I ever did | 0 |
| A lot of the time | 2 |  | Rather less than I used to | 1 |
| From time to time but not too often | 1 |  | Definitely less than I used to | 3 |
| Only occasionally | 0 |  | Hardly at all | 2 |
|  |  |  |  |  |
| **I feel cheerful:** | **D** |  | **I get sudden feelings of panic:** | **A** |
| Not at all | 3 |  | Very often indeed | 3 |
| Not often | 2 |  | Quite often | 2 |
| Sometimes | 1 |  | Not very often | 1 |
| Most of the time | 0 |  | Not at all | 0 |
|  |  |  |  |  |
| **I can sit at ease and feel relaxed:** | **A** |  | **I can enjoy a good book or radio or TV programme:** | **D** |
| Definitely | 0 |  | Often | 0 |
| Usually | 1 |  | Sometimes | 1 |
| Not often | 2 |  | Not often | 2 |
| Not at all | 3 |  | Very seldom | 3 |

**Section 4: About you**

Thank you for your time, we are approaching the end of the questionnaire, Finally, please tell us a little about yourself.

**How would you describe your gender?**

☐ Male

☐ Female

☐ Prefer to self-describe as (non-binary, gender-fluid, agender, please specify) [text entry]

☐ Prefer not to say

**This question is about your sexual orientation. Do you identify as:**

☐ Bisexual

☐ Gay/lesbian

☐ Heterosexual/straight

☐ Don't know

☐ Other [please specify]

☐ Prefer not to say

**What is your ethnicity?** *Please select* ***one option/ethnic group only*** *that you identify with*

**Asian or Asian British**

☐ Indian

☐ Pakistani

☐ Bangladeshi

☐ Chinese

☐ Any other Asian background [please specify]

**Black/African/Caribbean or black British**

☐ African

☐ Caribbean

☐ Any other black, African, or Caribbean background [please specify]

**Mixed or multiple ethnic background**

☐ White and black Caribbean

☐ White and black African

☐ White and Asian

☐ Any other mixed or multiple ethnic background [please specify]

**White background**

☐ White British (English, Welsh, Scottish, Northern Irish)

☐ White Irish

☐ White Gypsy or Irish Traveller

☐ Any other white ethnic background [please specify]

**Any other ethnic background**

☐ Any other ethnic background [please specify]

☐ Prefer not to say

**Is English the primary language you speak everyday?**

☐ Yes

☐ No [Primary language spoken]

**What is your highest level of education/training which you have completed to date?**

☐ Some secondary school or less

☐ Completed secondary school

☐ Post-secondary school technical training

☐ University degree

☐ Postgraduate Certificate or Diploma

☐ Postgraduate Degree (Masters or PhD)

☐ Other [please specify]

☐ Prefer not to say

**What best describes your employment status?**

☐ Employed full-time

☐ Employed part-time

☐ Self-employed

☐ Employed casually

☐ Full-time student

☐ Part-time student

☐ Not employed

☐ Other [please specify]

☐ Prefer not to say

**What is your total annual household income?**

☐ Less than £20,000

☐ £20,000 to £29,999

☐ £30,000 to £39,999

☐ £40,000 to £49,999

☐ £50,000 to £59,999

☐ £60,000 to £69,999

☐ £70,000 to £79,999

☐ £80,000 to £89,999

☐ £90,000 to £99,999

☐ £100,000 to £149,999

☐ £150,000 or more

☐ Other [please specify]

☐ Prefer not to say

**Is there anything else you wish to share with us, or do you have thoughts on what support is needed for families? Or how care can be improved for those who experienced loss? This may include your thoughts and experiences from any other loss that you were unable to focus on earlier in the survey or comments that you wished to make earlier but were unable to do so.**

Open text
